# Supplementary material
Source: Springer Nature journal article supplement (https://www.springermedizin.de/resource/supplementary/12936_2011_1761_MOESM3_ESM.pdf/9541664)
Supplement: MOESM3 [file 9541664]

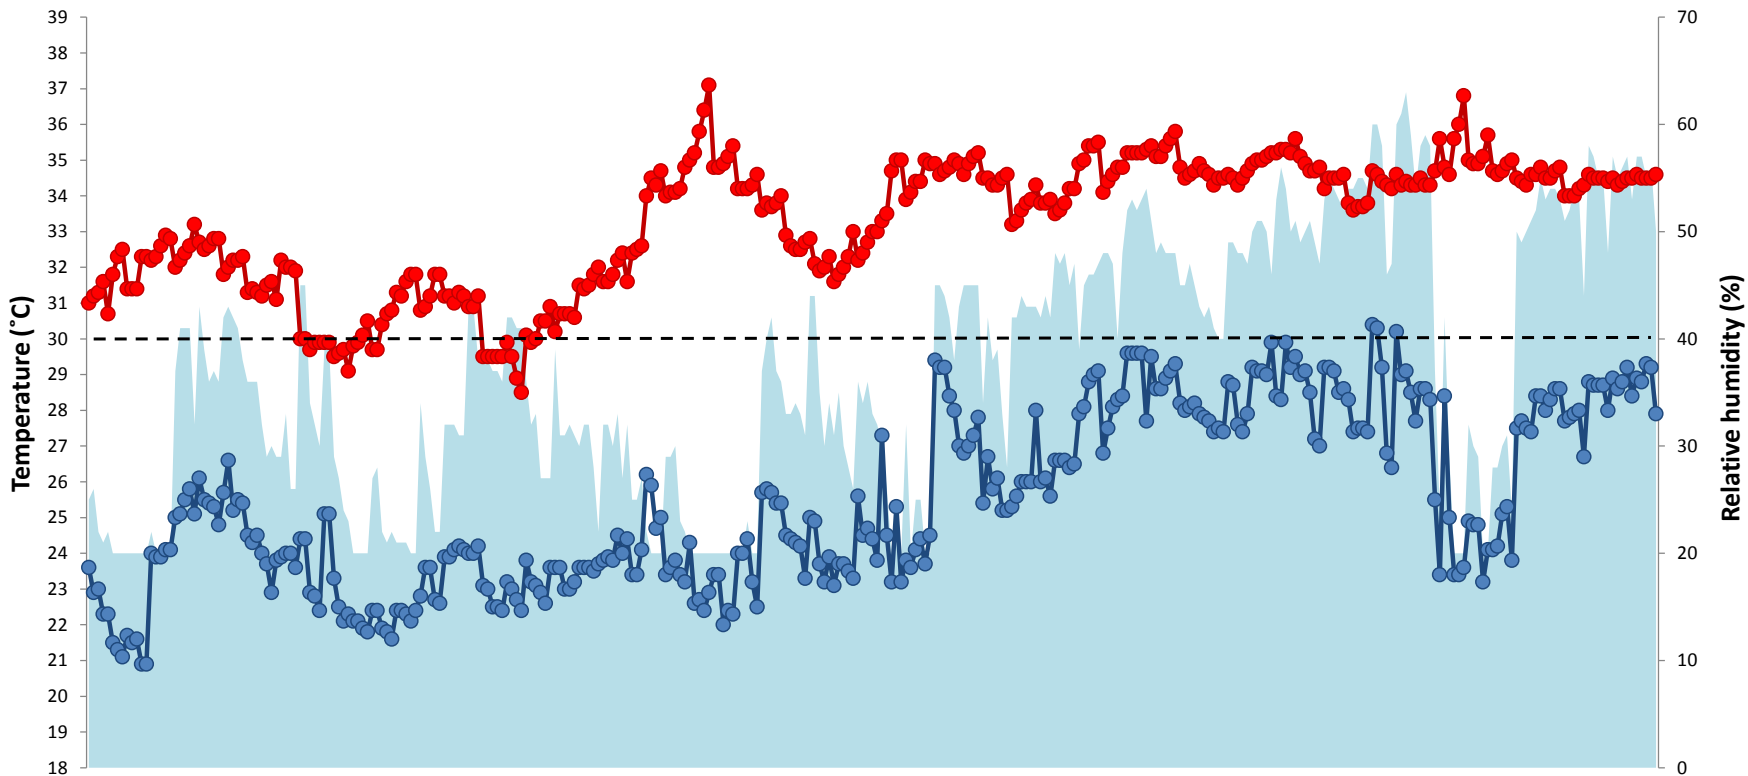

**Data points (temperature recorded at hourly intervals from 08:00 to 14:00 for 66 days)**

Relative humidity (%)      Ambient temperature (°C)      Temperature in box (°C)
